# Supplementary material for: DNA methylation analysis with nasal brushing for early diagnosis of sino-nasal malignant tumours
Source: Research Square preprint supplement (doi:10.21203/rs.3.rs-7433910/v1), 2025-11-06
Supplement: Supplementary file [file 4074c8b69ebf9349cafb8338.pdf]

**SupplementaryFile3:**

Risk Ratio(RR) and 95% confidence intervals (CI) of obtaining a positive methylation score compared to normal mucosa. P-value derived from Fisher’s exact test for the SNIP vs normal comparison. All other RR values are referenced to the normal group. A RR > 1 indicates increased likelihood of score positivity relative to normal mucosa.

|            |      | P-value F-Test | RR   | L95%CI | U95%CI |
|------------|------|----------------|------|--------|--------|
| SNIP       |      |                | 8.19 | 4.15   | 16.14  |
| Inf. Polyp |      |                | 2.72 | 1.18   | 6.27   |
| ITAC       | Vs N | <0.0001        | 8,21 | 4.22   | 15.98  |
| SNCC       |      |                | 6.82 | 3.44   | 13.54  |
